# Supplementary material
Source: MDPI journal article supplement (https://www.mdpi.com/2076-2615/11/9/2626)
Supplement: s1 [file s1]

Archive with 1 entries (1 files):
- animals-1336102-supplementary.pdf
